# Supplementary material for: Infant movement classification through pressure distribution analysis
Source: Springer Nature journal article supplement (doi:10.1038/s43856-023-00342-5), 2023-08-16
Supplement: MOESM1 [file 43856_2023_342_MOESM1_ESM.pdf]

## **Infant movement classification through pressure distribution analysis**

Tomas Kulvicius,<sup>1,2\*~</sup> Dajie Zhang<sup>1,3,4\*</sup>, Karin Nielsen-Saines<sup>5</sup>, Sven Bölte<sup>6,7,8</sup>, Marc Kraft<sup>9</sup>, Christa Einspieler<sup>4</sup>, Luise Poustka<sup>1,3</sup>, Florentin Wörgötter<sup>3,9+</sup>, Peter B Marschik<sup>1,3,4,6+</sup>

<sup>1</sup>Child and Adolescent Psychiatry and Psychotherapy, University Medical Center  
Göttingen, Göttingen, Germany

<sup>2</sup>Department for Computational Neuroscience, Third Institute of Physics-Biophysics,  
Georg-August-University of Göttingen, Göttingen, Germany

<sup>3</sup>Leibniz-ScienceCampus Primate Cognition, Göttingen, Germany

<sup>4</sup>iDN – interdisciplinary Developmental Neuroscience, Division of Phoniatrics, Medical  
University of Graz, Graz, Austria

<sup>5</sup>Division of Pediatric Infectious Diseases, David Geffen UCLA School of Medicine, Los  
Angeles, USA

<sup>6</sup>Center of Neurodevelopmental Disorders (KIND), Centre for Psychiatry Research,  
Department of Women's and Children's Health, Karolinska Institutet, Stockholm, Sweden

<sup>7</sup>Child and Adolescent Psychiatry, Stockholm Health Care Services, Region Stockholm,  
Stockholm, Sweden

<sup>8</sup>Curtin Autism Research Group, Curtin School of Allied Health, Curtin University, Perth,  
Western Australia

<sup>9</sup>Department of Medical Engineering, Technical University Berlin, Berlin, Germany

~Corresponding author (E-mail: tomas.kulvicius@uni-goettingen.de)

\*These authors contributed equally

+These authors jointly supervised this work

## Supplemental material

### Supplementary Table 1: Details of the Support Vector Machine (SVM), Feed Forward Network (FFN), Convolutional Neural Network (CNN), and Long Short-Term Memory (LSTM) network architectures.

After each fully connected (FC), convolutional layer (Conv) and LSTM layer, a batch normalisation layer, and a drop-out layer (10%) were used. ReLU activation functions were used in the FC, Conv and LSTM layers, whereas in the output layer a sigmoid activation function was used.

| SVM    |            |                       |                       |                       |                 |              |              |             |
|--------|------------|-----------------------|-----------------------|-----------------------|-----------------|--------------|--------------|-------------|
| Name   | Input dim. | Kernel                |                       | Output dimension      |                 |              |              |             |
| S1.RBF | 12         | Radial basis function |                       | 1                     |                 |              |              |             |
| S1.P1  | 12         | Linear polynomial     |                       | 1                     |                 |              |              |             |
| S1.P2  | 12         | Quadratic polynomial  |                       | 1                     |                 |              |              |             |
| S1.P3  | 12         | Cubic polynomial      |                       | 1                     |                 |              |              |             |
| S2.RBF | 24         | Radial basis function |                       | 1                     |                 |              |              |             |
| S2.P1  | 24         | Linear polynomial     |                       | 1                     |                 |              |              |             |
| S2.P2  | 24         | Quadratic polynomial  |                       | 1                     |                 |              |              |             |
| S2.P3  | 24         | Cubic polynomial      |                       | 1                     |                 |              |              |             |
| FFN    |            |                       |                       |                       |                 |              |              |             |
| Name   | Input dim. | FC 1 neurons          | FC 2 neurons          | Output dimension      |                 |              |              |             |
| F1.1   | 12         | 100                   | -                     | 1                     |                 |              |              |             |
| F1.2   | 24         | 100                   | -                     | 1                     |                 |              |              |             |
| F1.3   | 24         | 200                   | -                     | 1                     |                 |              |              |             |
| F2     | 24         | 200                   | 100                   | 1                     |                 |              |              |             |
| CNN    |            |                       |                       |                       |                 |              |              |             |
| Name   | Input dim. | Conv 1 filters / size | Conv 2 filters / size | Conv 3 filters / size | Average pooling | FC 1 neurons | FC 2 neurons | Output dim. |
| C1F1.1 | 500x6      | 4 / 7x1               | -                     | -                     | 500x1           | 100          | -            | 1           |
| C1F1.2 | 500x6      | 16 / 13x1             | -                     | -                     | 500x1           | 100          | -            | 1           |
| C1F1.3 | 500x6      | 64 / 21x1             | -                     | -                     | 500x1           | 100          | -            | 1           |
| C1F1.4 | 500x6      | 64 / 21x1             | -                     | -                     | 500x1           | 200          | -            | 1           |
| C1F2   | 500x6      | 64 / 21x1             | -                     | -                     | 500x1           | 200          | 100          | 1           |
| C2F1   | 500x6      | 4 / 7x1               | 16 / 13x1             | -                     | 500x1           | 100          | -            | 1           |
| C3F1.1 | 500x6      | 4 / 7x1               | 16 / 13x1             | 64 / 21x1             | 500x1           | 100          | -            | 1           |
| C3F1.2 | 500x6      | 4 / 7x1               | 16 / 13x1             | 64 / 21x1             | 500x1           | 200          | -            | 1           |
| C3F2   | 500x6      | 4 / 7x1               | 16 / 13x1             | 64 / 21x1             | 500x1           | 200          | 100          | 1           |
| LSTM   |            |                       |                       |                       |                 |              |              |             |
| Name   | Input dim. | LSTM 1 neurons        | LSTM 2 neurons        | FC 1 neurons          | FC 2 neurons    | Output dim.  |              |             |
| L1F1.1 | 25x120     | 64                    | -                     | 100                   | -               | 1            |              |             |
| L1F1.2 | 50x60      | 64                    | -                     | 100                   | -               | 1            |              |             |
| L1F1.3 | 100x30     | 64                    | -                     | 100                   | -               | 1            |              |             |
| L1F1.4 | 50x60      | 64                    | -                     | 200                   | -               | 1            |              |             |
| L1F2   | 50x60      | 64                    | -                     | 200                   | 100             | 1            |              |             |
| L2F2.1 | 50x60      | 64                    | 32                    | 200                   | 100             | 1            |              |             |
| L2F2.2 | 50x60      | 128                   | 64                    | 200                   | 100             | 1            |              |             |

**Supplementary Table 2: Comparison of different classifiers (see Supplementary Table 1) on classification of the presence vs. absence of fidgety movements.**

Average sensitivity, specificity and balanced accuracy is shown obtained on five test sets. Numbers in brackets correspond to confidence intervals of the mean (CI 95%). Numbers in bold font correspond to the accuracies of the best models. Raw data is available in Supplementary Data.

| Classifier | Sensitivity (%)     | Specificity (%)     | Balanced Accuracy (%)      |
|------------|---------------------|---------------------|----------------------------|
| SVM        |                     |                     |                            |
| S1.RBF     | 73.15 [68.09 78.20] | 69.83 [62.39 77.27] | 71.49 [69.70 73.28]        |
| S1.P1      | 72.10 [66.46 77.73] | 69.95 [60.13 79.77] | 71.03 [68.77 73.28]        |
| S1.P2      | 72.30 [66.64 77.96] | 68.74 [58.94 78.53] | 70.52 [68.24 72.80]        |
| S1.P3      | 72.92 [68.40 77.43] | 65.35 [57.51 73.19] | 69.13 [66.63 71.63]        |
| S2.RBF     | 74.72 [70.68 78.77] | 73.01 [66.51 79.52] | 73.87 [70.92 76.82]        |
| S2.P1      | 78.60 [76.80 80.41] | 73.70 [65.65 81.75] | <b>76.15</b> [72.00 80.30] |
| S2.P2      | 80.49 [77.56 83.43] | 71.54 [65.27 77.82] | 76.02 [72.71 79.32]        |
| S2.P3      | 79.04 [75.77 82.30] | 73.12 [67.39 78.85] | 76.08 [74.57 77.58]        |
| FFN        |                     |                     |                            |
| F1.1       | 73.95 [70.60 77.29] | 70.27 [59.16 81.39] | 72.11 [68.11 76.11]        |
| F1.2       | 81.32 [78.46 84.17] | 68.29 [60.89 75.69] | 74.80 [71.16 78.45]        |
| F1.3       | 79.96 [77.11 82.82] | 71.18 [63.44 78.92] | <b>75.57</b> [72.65 78.49] |
| F2         | 79.90 [74.02 85.78] | 67.25 [54.69 79.81] | 73.58 [69.52 77.63]        |
| CNN        |                     |                     |                            |
| C1F1.1     | 85.35 [82.47 88.22] | 69.58 [62.03 77.13] | 77.46 [74.09 80.84]        |
| C1F1.2     | 81.66 [76.69 86.63] | 68.04 [58.18 77.90] | 74.85 [71.15 78.55]        |
| C1F1.3     | 80.57 [78.10 83.04] | 69.48 [64.00 74.96] | 75.03 [71.54 78.51]        |
| C1F1.4     | 78.03 [74.10 81.96] | 69.82 [62.59 77.05] | 73.93 [70.36 77.49]        |
| C1F2       | 79.26 [75.62 82.90] | 72.75 [65.08 80.41] | 76.00 [72.93 79.08]        |
| C2F1       | 84.42 [80.15 88.69] | 74.30 [62.43 86.16] | 79.36 [73.84 84.88]        |
| C3F1.1     | 84.48 [79.25 89.70] | 75.71 [68.62 82.80] | 80.09 [77.37 82.81]        |
| C3F1.2     | 86.06 [81.89 90.24] | 74.80 [67.72 81.89] | 80.43 [76.70 84.17]        |
| C3F2       | 86.48 [82.92 90.03] | 76.37 [70.71 82.04] | <b>81.43</b> [78.00 84.86] |
| LSTM       |                     |                     |                            |
| L1F1.1     | 69.54 [66.14 72.94] | 64.59 [56.34 72.83] | 67.06 [63.85 70.28]        |
| L1F1.2     | 77.89 [73.67 82.12] | 60.14 [50.85 69.42] | 69.01 [65.44 72.59]        |
| L1F1.3     | 76.10 [71.00 81.20] | 57.75 [50.24 65.25] | 66.93 [64.91 68.95]        |
| L1F1.4     | 75.11 [69.23 80.98] | 61.97 [51.86 72.08] | 68.54 [63.74 73.33]        |
| L1F2       | 78.13 [73.97 82.30] | 59.94 [53.60 66.29] | <b>69.04</b> [65.94 72.13] |
| L2F2.1     | 82.21 [76.24 88.19] | 51.99 [34.45 69.54] | 67.10 [61.06 73.15]        |
| L2F2.2     | 75.11 [69.23 80.98] | 61.97 [51.86 72.08] | 68.54 [63.74 73.33]        |
